# Supplementary material for: Myeloid HDAC3 Deletion Protects Against Traumatic Optic Injury
Source: Research Square preprint supplement (doi:10.21203/rs.3.rs-7483262/v1), 2025-09-17

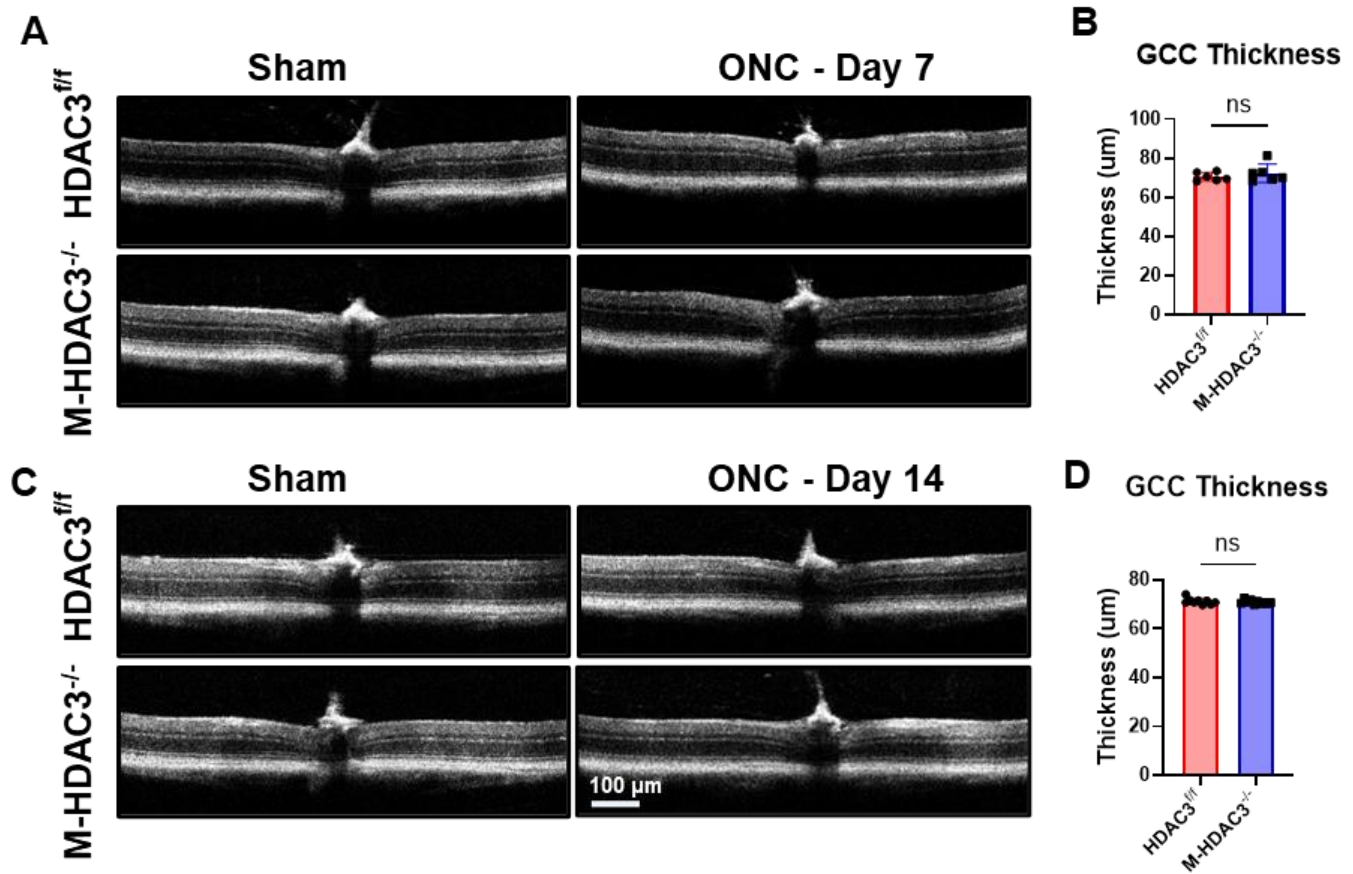

**Figure S1. OCT data from sham and injured  $M-HDAC3^{-/-}$  and  $HDAC3^{fl/fl}$  mice.** Optical coherence tomography (OCT) performed on anesthetized mice at 7 (**A, B**) and 14 days (**C, D**) post-ONC shows no improvement in ganglion cell complex (GCC) layer thickness in  $M-HDAC3^{-/-}$  retinas compared to control  $HDAC3^{fl/fl}$ . n= 9-10 per group.

## Uninjured sham groups

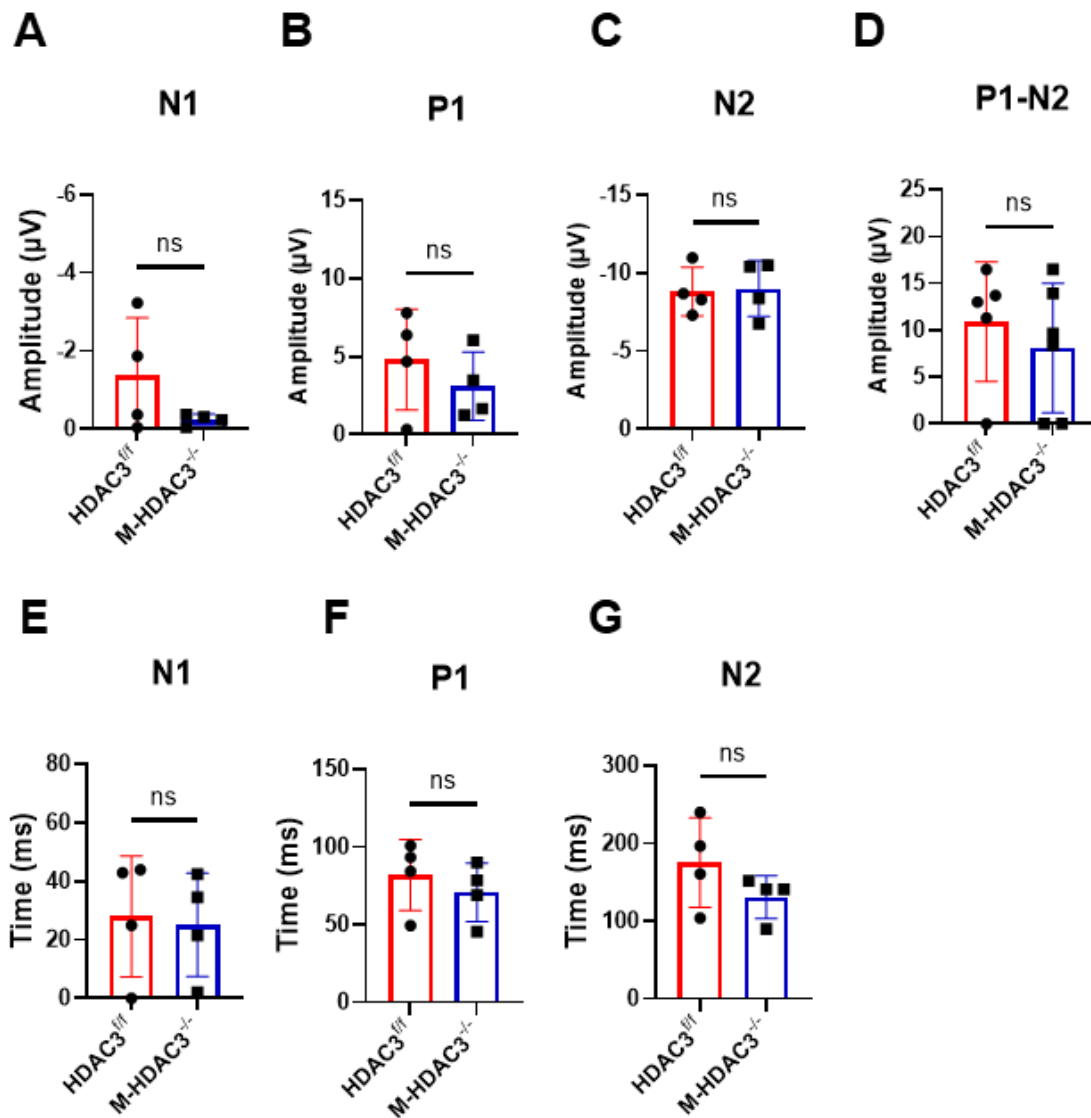

**Figure S2. PERG data from M-HDAC3<sup>-/-</sup> and HDAC3<sup>ff</sup> sham mice.** Quantification of N1, P1, and N2 waveforms from PERG conducted on HDAC3<sup>ff</sup> and M-HDAC3<sup>-/-</sup> sham mice demonstrates no significant impact of myeloid HDAC3 deletion on the amplitude of N1, P1, and N2 (A-D), nor on their latencies (E-G).

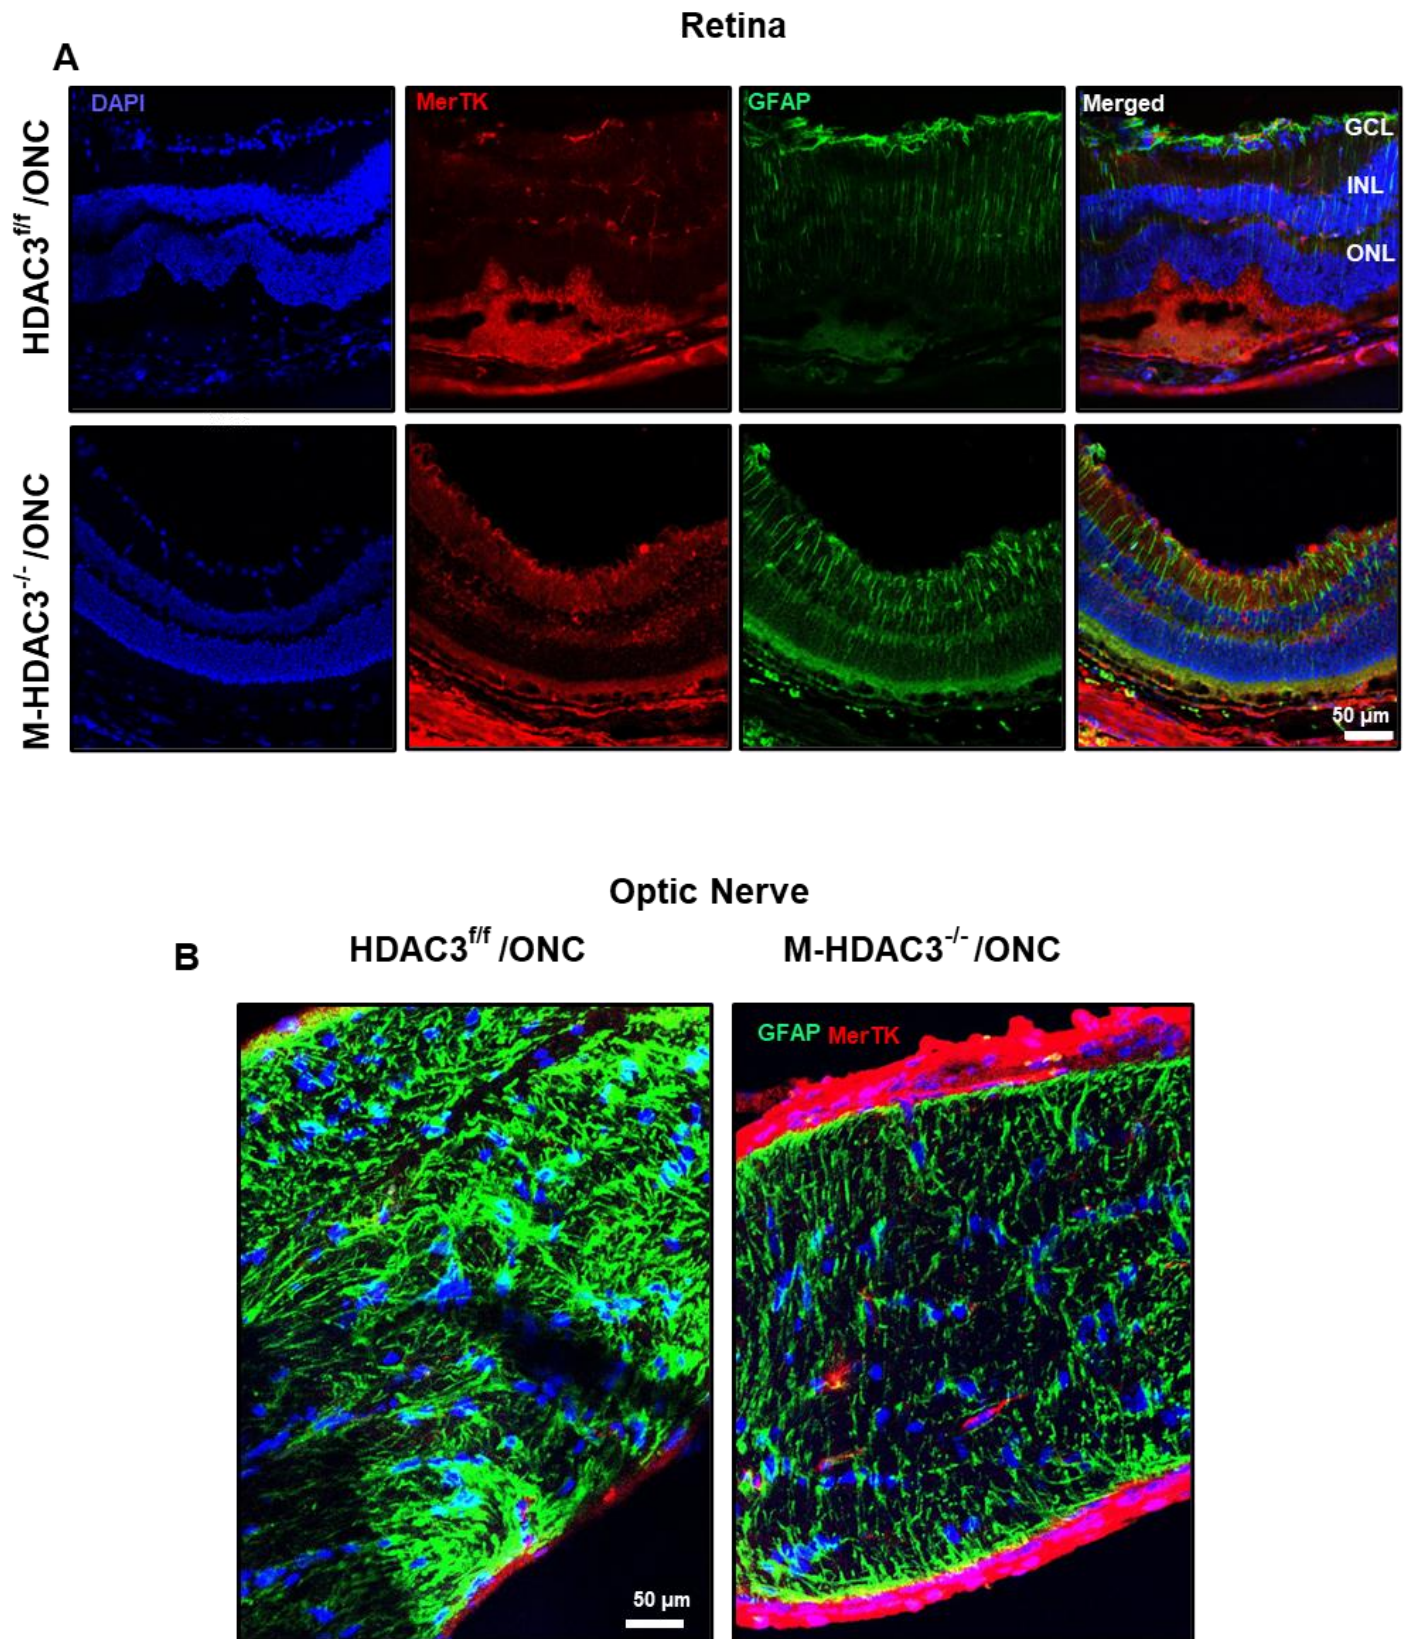

**Figure S3. MerTK expression in glial cells following ONC injury. (A)** Representative confocal images of glial cells expressing GFAP (green) in the retinas of HDAC3<sup>f/f</sup> and M-HDAC3<sup>-/-</sup> mice with minimal colocalization with

MerTK (red) at day 5 post-ONC. **(B)** Similarly, in injured optic nerve sections, GFAP and MerTK colocalization were minimal in M-HDAC3<sup>-/-</sup> and HDAC3<sup>fl/fl</sup> control mice at day 5 post-ONC.

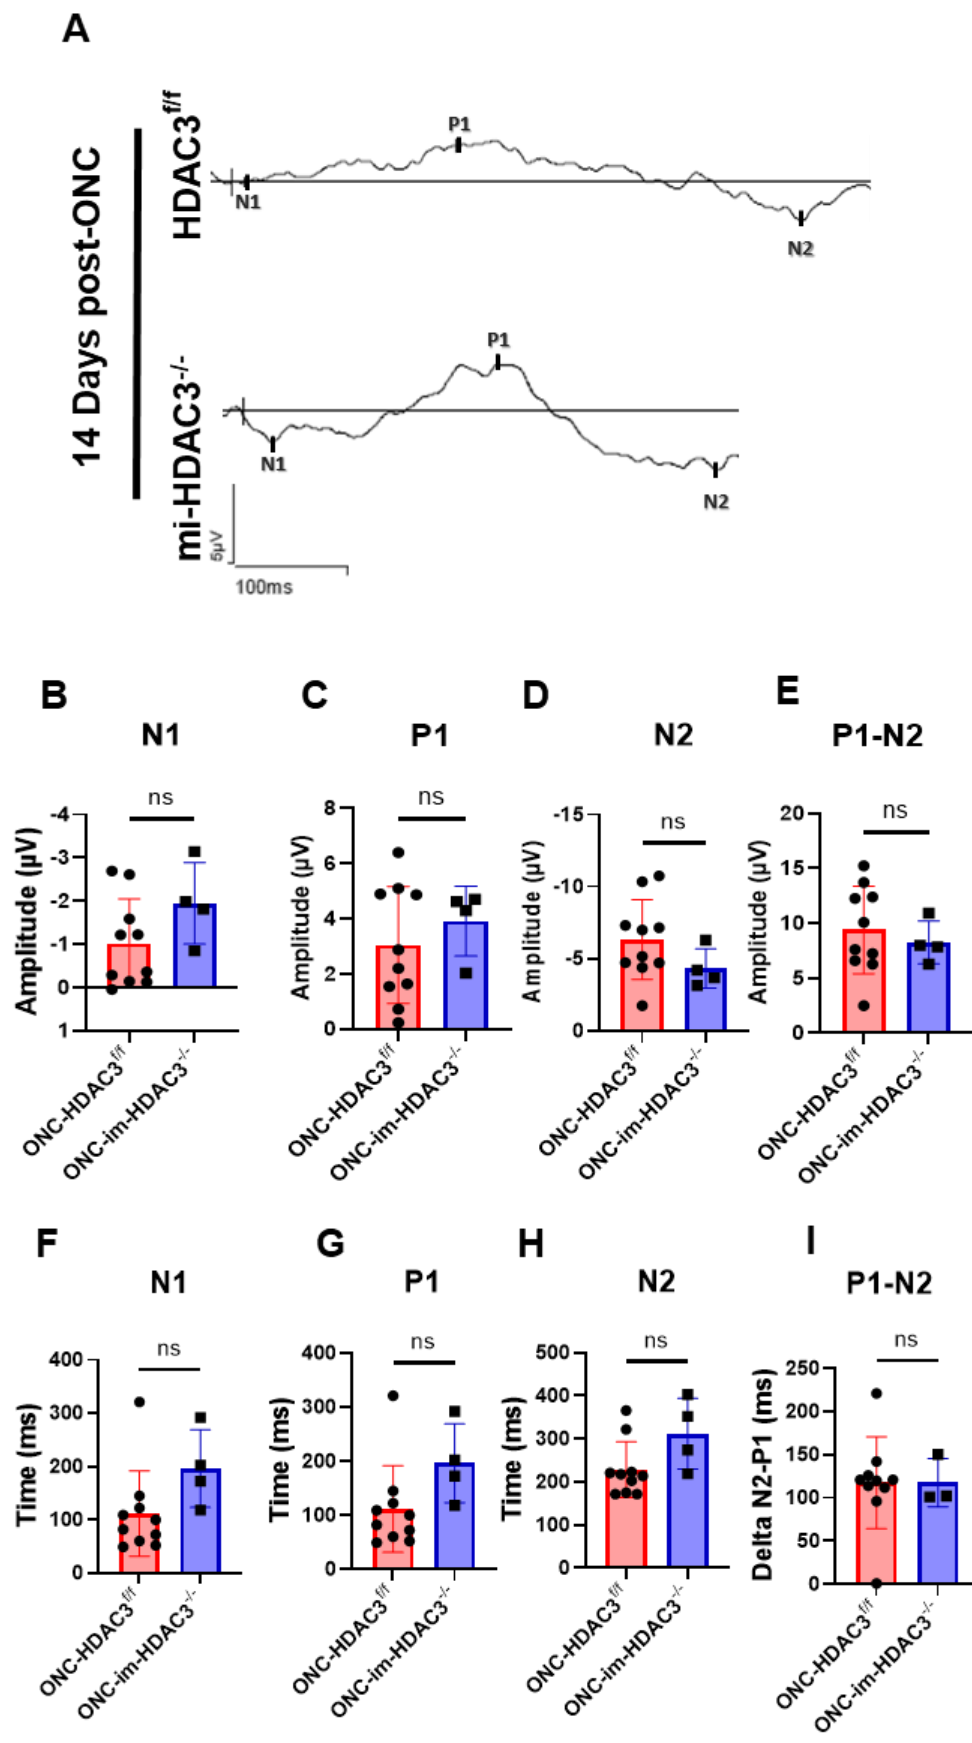

**Figure S4. PERG data from sham and injured im-HDAC3<sup>-/-</sup> and HDAC3<sup>fl/fl</sup> mice. (A)** Representative of N1, P1, and N2 waveforms in the retinas of microglia-specific HDAC3 KO (im-HDAC3<sup>-/-</sup>) and HDAC3<sup>fl/fl</sup> mice 14 days post-ONC. Quantification of N1, P1, and N2 waveforms demonstrates no significant impact of microglia-only HDAC3 deletion on the amplitude of N1, P1, and N2 **(B-E)**, nor their latencies **(F-I)**.

# Uncropped Western blots

F6

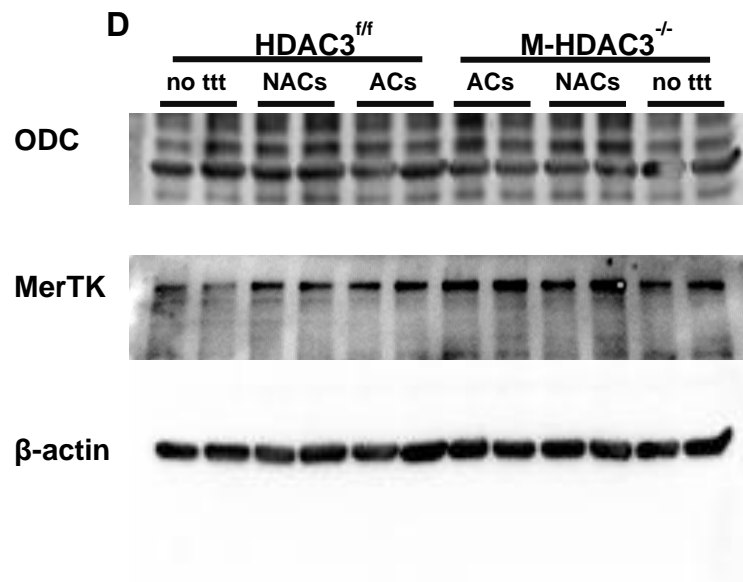

Supplement: Supplementary file 1 [file 9c4c0974d1add971b2476e6b.pdf]
